# Supplementary material for: Impact and Effectiveness of 10 and 13-Valent Pneumococcal Conjugate Vaccines on Hospitalization and Mortality in Children Aged Less than 5 Years in Latin American Countries: A Systematic Review
Source: PubMed Central journal article supplement (PMC5152835; doi:10.1371/journal.pone.0166736), 2016-12-12
Supplement: pone.0166736.s004.pdf [file pone.0166736.s004.pdf]

## S2 Appendix: Full strategies for grey, unpublished and supplementary search

| Type of search                                         | Resources accessed                                                                                                                                                                                                                                                                                                                                                                                                                                                                                                                                                                                                                                                                                                                                                                                       |
|--------------------------------------------------------|----------------------------------------------------------------------------------------------------------------------------------------------------------------------------------------------------------------------------------------------------------------------------------------------------------------------------------------------------------------------------------------------------------------------------------------------------------------------------------------------------------------------------------------------------------------------------------------------------------------------------------------------------------------------------------------------------------------------------------------------------------------------------------------------------------|
| Grey literature websites searched                      | <p>Grey literature report – (<a href="http://www.greylit.org">http://www.greylit.org</a>)</p> <p>SIGLE- System for Information on Grey Literature in Europe - Open Grey –(<a href="http://www.opengrey.eu">http://www.opengrey.eu</a>)</p> <p>Clinical Medicine NetPrints – (<a href="https://searchworks.stanford.edu">https://searchworks.stanford.edu</a>)</p> <p>Gray Literature in Health Research (<a href="http://researchguides.dml.georgetown.edu/content.php?pid=352972&amp;sid=2887419">http://researchguides.dml.georgetown.edu/content.php?pid=352972&amp;sid=2887419</a>)</p> <p>Grey Literature in the Health Sciences (<a href="http://guides.library.upenn.edu/healthgreylit?hs=a">http://guides.library.upenn.edu/healthgreylit?hs=a</a>)</p>                                          |
| Journals reviewed                                      | <p>Annals of Vaccines and Immunization</p> <p>International Journal of Vaccines &amp; Vaccination</p> <p>International Journal of Vaccines and Immunization</p> <p>Journal of Vaccines</p> <p>Journal of Vaccines &amp; Vaccination</p> <p>Journal of Vaccines and Immunology</p> <p>Paediatric Respiratory Reviews</p> <p>Revista Argentina de Salud Pública</p> <p>Revista Chilena de Salud Pública</p> <p>Vaccine: Development and Therapy</p> <p>World Journal of Vaccines</p> <p>152 issues reviewed</p>                                                                                                                                                                                                                                                                                            |
| Conference and Meetings annals or proceedings reviewed | <p>World Congress of the World Society for Pediatric Infectious Diseases</p> <p>Annual Meeting of the European Society Pediatric Infection Diseases</p> <p>International Symposium on Pneumococci &amp; Pneumococcal Diseases</p> <p>Jornadas Nacionais de Imunização da Sociedade Brasileira de Imunizações</p> <p>Congreso Latinoamericano de Infectología Pediátrica</p> <p>International Congress on Pediatric Pulmonology</p> <p>American Society of Tropical Medicine &amp; Hygiene Annual Meeting</p> <p>IDweek, Infection Disease Society of America</p> <p>Symposium on New Vaccines</p> <p>Interscience Conference on Antimicrobial Agents and Chemotherapy</p> <p>Annual Meeting of the American Society for Microbiology</p> <p>International Society of Vaccines Annual Global Congress</p> |
| Finished and ongoing trial sites reviewed              | <p>International Standard Randomized Controlled Trial Number Registry</p> <p>EU Clinical Trials Register</p> <p>Clinicaltrials.gov</p> <p>Registro Brasileiro de Ensaios Clínicos</p> <p>Brazil Clinical Trials</p>                                                                                                                                                                                                                                                                                                                                                                                                                                                                                                                                                                                      |

|                                   |                                                                |
|-----------------------------------|----------------------------------------------------------------|
|                                   | WHO International Clinical Trials Registry Platform            |
| Manufacturer and Expert contacted | 16 experts<br>2 manufacturers                                  |
| Reference screening reviewed      | 22 Articles selected<br>41 Reviews<br>3200 references screened |

Supplementary search result by type of document retrieved (January 2009 – January 2016)

| Type of document           | Reference screening | Hand search journals | Clinical trials search | Meeting, Congress abstract book | Expert contact, GSK/Pfizer | Grey literature database search | Total |
|----------------------------|---------------------|----------------------|------------------------|---------------------------------|----------------------------|---------------------------------|-------|
| Journal Article            | 10                  | 1                    | 0                      | 0                               | 7                          | 0                               | 18    |
| Abstract Poster            | 3                   | 0                    | 0                      | 50                              | 28                         | 0                               | 81    |
| Abstract Oral Presentation | 6                   | 0                    | 0                      | 33                              | 50                         | 0                               | 89    |
| PPT Presentation           | 1                   | 0                    | 0                      | 0                               | 0                          | 0                               | 1     |
| Report                     | 3                   | 0                    | 1                      | 0                               | 0                          | 0                               | 4     |
| Total                      | 23                  | 1                    | 1                      | 83                              | 85                         | 0                               | 193   |
